# Supplementary material for: Charge transfer and strain tuned antiferromagnetism in the two-dimensional CrCl3/[Mo2C(–O)]2 heterojunction
Source: Royal Society of Chemistry journal article supplement (doi:10.1039/d0cp03406a), 2020-01-01
Supplement: d0cp03406a1.pdf [file d0cp03406a1.pdf]

### Supporting Information for

## Charge transfer and strain tuned antiferromagnetism in two-dimensional $\text{CrCl}_3/[\text{Mo}_2\text{C}(\text{-O})_2]$ heterojunction

Mingyu Zhao<sup>1\*</sup>, Xianqi Dai<sup>2</sup>, Yanan Tang<sup>3\*</sup>

1.School of Physics, Southeast University, Nanjing 211189, China

2.School of Physics, Henan Normal University, Henan 453000, China

3.School of Physics, Zhengzhou Normal University, Henan 450000, China

\* Email: rmzhaomy@seu.edu.cn

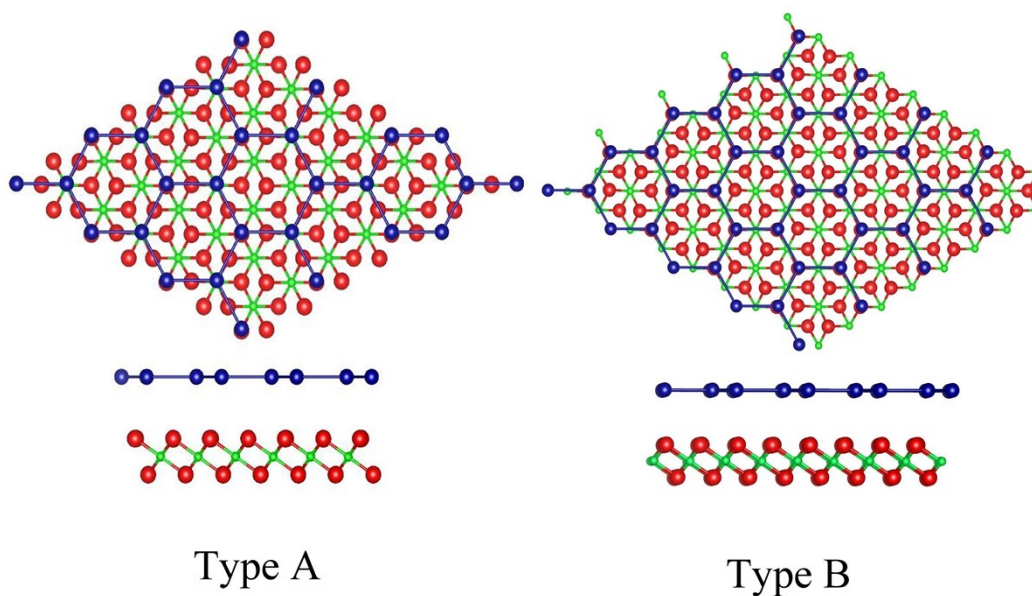

FIG. S1 Two different stacking modes for  $\text{CrCl}_3/(\text{Mo}_2\text{C})_2$  system (The skeleton of Cr is preserved in  $\text{CrCl}_3$ )

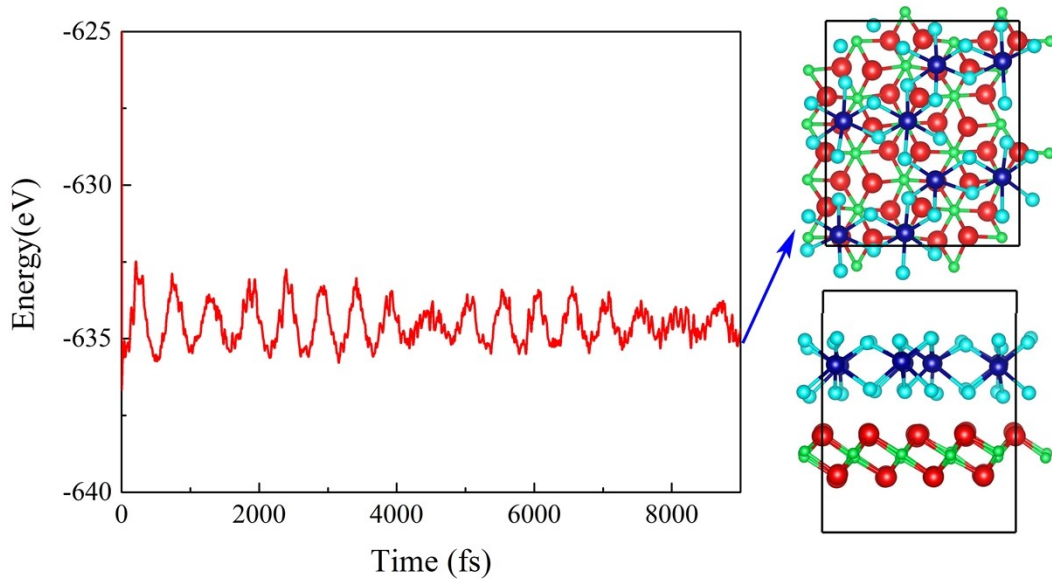

Fig. S2 The total energy fluctuations with time obtained by MD simulations at 300 K for 9 ps. The final configuration of the  $\text{CrCl}_3/\text{Mo}_2\text{C}$  after the 9 ps MD simulation.s

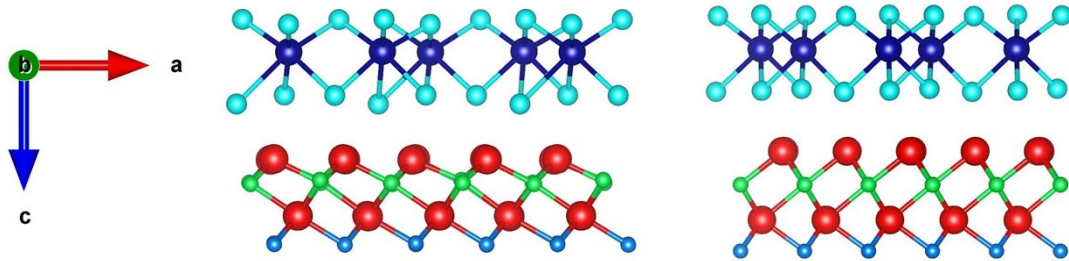

FIG. S3 Two different adsorption modes for O in  $\text{CrCl}_3/\text{Mo}_2\text{C-O}$  system

TABLE S1. The six-fold rotational symmetric magnetocrystalline anisotropy  $K^z$  and  $K^{xy}$  of  $\text{CrCl}_3/\text{Mo}_2\text{C-O}$  system and Néel temperature ( $T_N$ ) under different strain.

| strain | J (meV) | $K^z$ (meV) | $K^{xy}$ (meV) | $T_N$ (K) |
|--------|---------|-------------|----------------|-----------|
| 0%     | 6.83    | -0.125      | 0.075          | 36        |
| -1%    | 8.33    | 1.1125      | 1.1875         | 46        |
| -2%    | 11.5    | 0.45        | 0.7            | 60        |
| -3%    | 28.16   | 1.0125      | 0.8125         | 146       |
